# Supplementary material for: Constructing urchin-like Ni3S2@Ni3B on Ni plate as a highly efficient bifunctional electrocatalyst for water splitting reaction
Source: Royal Society of Chemistry journal article supplement (doi:10.1039/d1nr04965h), 2021-01-01
Supplement: d1nr04965h1.pdf [file d1nr04965h1.pdf]

*Electronic Supplementary Information*

**Constructing Urchin-Like Ni<sub>3</sub>S<sub>2</sub>@Ni<sub>3</sub>B on Ni Plate as a Highly Efficient Bifunctional Electrocatalyst for Water Splitting Reaction**

Yuanyuan Wu <sup>a, b, c#</sup>, Junqiang Yin <sup>a, c, d#</sup>, Wei Jiang <sup>a, c, d</sup>, Hongji Li <sup>a, c, d</sup>, Chunbo Liu <sup>a, b, c, d\*</sup>, Guangbo Che <sup>a, b, c, d\*</sup>

<sup>a</sup> *Key Laboratory of Preparation Application of Environmental Friendly Materials, Ministry of Education, Jilin Normal University, Siping 136000, P. R. China*

<sup>b</sup> *College of Chemistry, Jilin Normal University, Siping 13600, P. R. China*

<sup>c</sup> *Key Laboratory of Environmental Materials and Pollution Control, the Education Department of Jilin Province, Jilin Normal University, Siping 13600, P. R. China*

<sup>d</sup> *College of Environmental Science and Engineering, Jilin Normal University, Siping 13600, P. R. China*

<sup>\*</sup> *Corresponding author: Guangbo Che (guangboche@jlnu.edu.cn), Chunbo Liu (chunboliu@jlnu.edu.cn)*

<sup>#</sup> *The authors contributed equally to this work.*

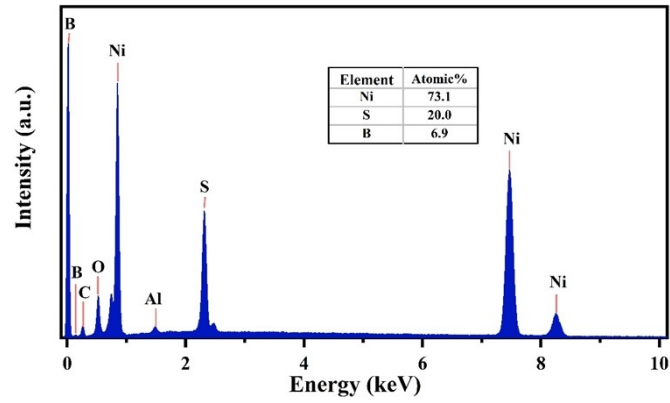

**Fig. S1.** the EDS spectrum and corresponding element contents of  $\text{Ni}_3\text{S}_2@\text{Ni}_3\text{B}$

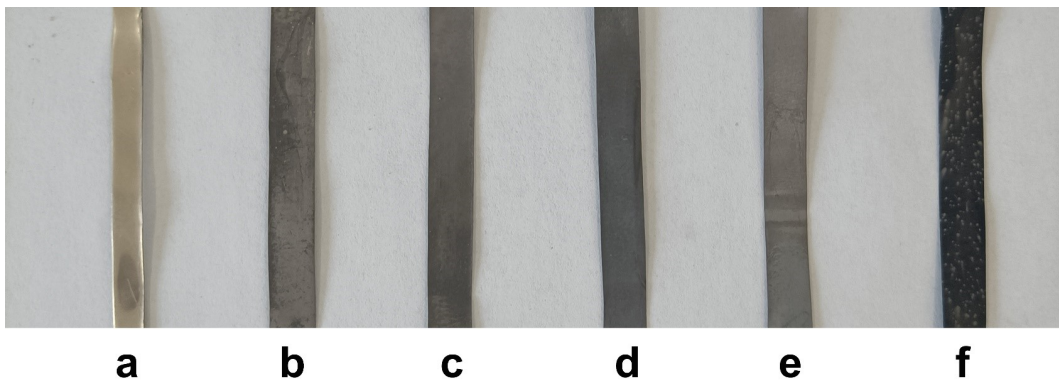

**Fig. S2.** Photograph of (a) Ni plates, (b)  $\text{Ni}_3\text{B}/\text{NP}$ , (c)  $\text{Ni}_3\text{B}/\text{NP}-1$ , (d)  $\text{Ni}_3\text{B}/\text{NP}-2$ , (e)  $\text{Ni}_3\text{B}/\text{NP}-3$  and (f)  $\text{Ni}_3\text{S}_2@\text{Ni}_3\text{B}/\text{NP}$ .

**Table S1.** Comparison of the pH of solutions containing different components.

| Solution composition                                                                            | pH   |
|-------------------------------------------------------------------------------------------------|------|
| $\text{CO}(\text{NH}_2)_2$                                                                      | 9.25 |
| $\text{NH}_4\text{F}$                                                                           | 6.56 |
| $\text{CO}(\text{NH}_2)_2 + \text{NH}_4\text{F}$                                                | 8.68 |
| $\text{CO}(\text{NH}_2)_2 + \text{NH}_4\text{F} + \text{Na}_2\text{S}\cdot 9\text{H}_2\text{O}$ | 8.75 |

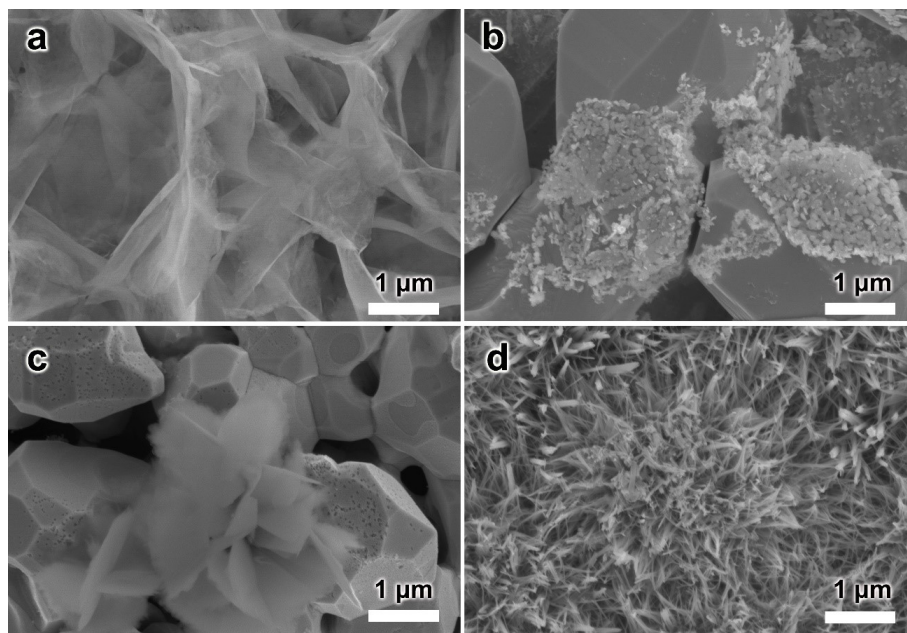

**Fig. S3.** SEM images of (a)  $\text{Ni}_3\text{B/NP-1}$ , (b)  $\text{Ni}_3\text{B/NP-2}$ , (c)  $\text{Ni}_3\text{B/NP-3}$  and (d)  $\text{Ni}_3\text{S}_2@\text{Ni}_3\text{B/NP}$ .

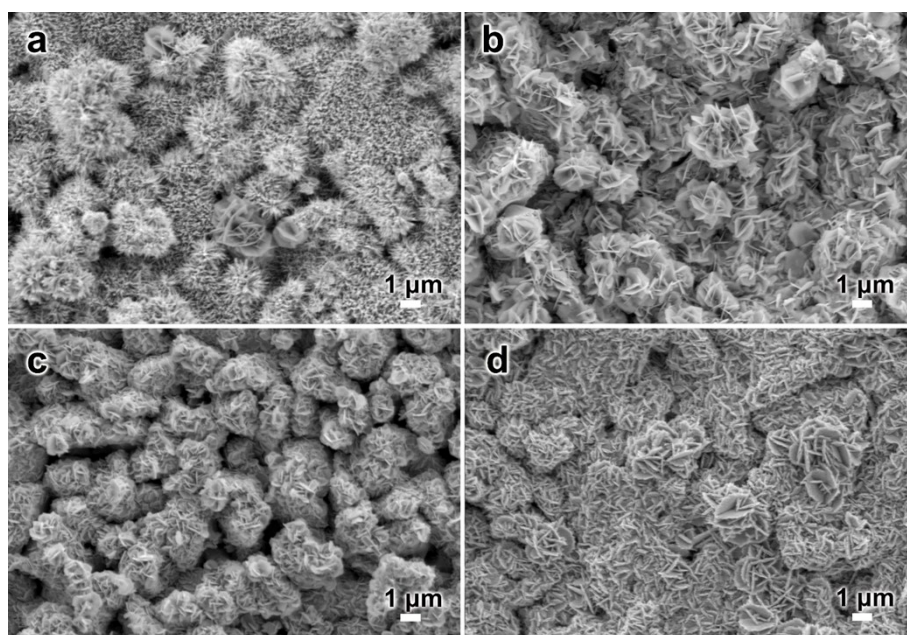

**Fig. S4.** SEM images of different sulfur ion concentrations (a) 80 mL, (b) 120 mL, (c) 160 mL and (d) 200 mL for sulfide reactions.

**Table S2.** The simulated series resistance ( $R_s$ ) and charge transfer resistance ( $R_{ct}$ ) based on the Nyquist plots (Figure 4a) in the presence of  $\text{Ni}_3\text{S}_2@\text{Ni}_3\text{B}/\text{NP}$ ,  $\text{Ni}_3\text{S}_2/\text{NP}$  and  $\text{Ni}_3\text{B}/\text{NP}$ .

| Sample                                                | $R_s$ ( $\Omega \text{ cm}^2$ ) | $R_{ct}$ ( $\Omega \text{ cm}^2$ ) |
|-------------------------------------------------------|---------------------------------|------------------------------------|
| $\text{Ni}_3\text{S}_2@\text{Ni}_3\text{B}/\text{NP}$ | 0.44                            | 4.83                               |
| $\text{Ni}_3\text{B}/\text{NP}$                       | 0.28                            | 12.41                              |
| $\text{Ni}_3\text{S}_2/\text{NP}$                     | 0.59                            | 9.95                               |

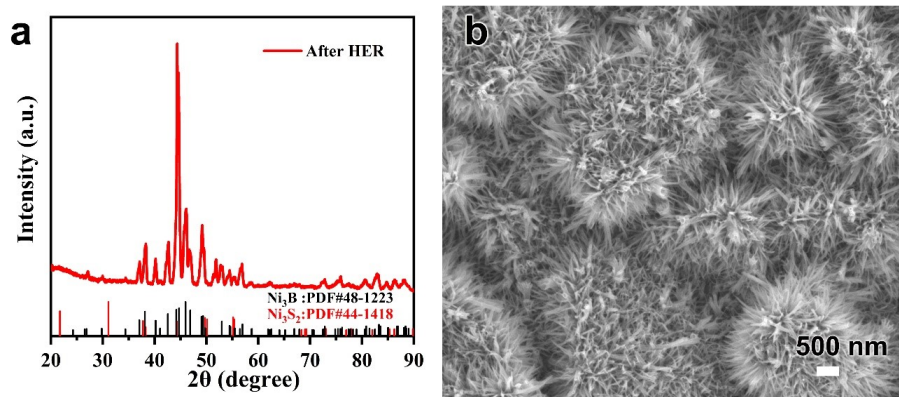

**Fig. S5.** (a) XRD pattern and (b) SEM image of  $\text{Ni}_3\text{S}_2@\text{Ni}_3\text{B}/\text{NP}$  after HER.

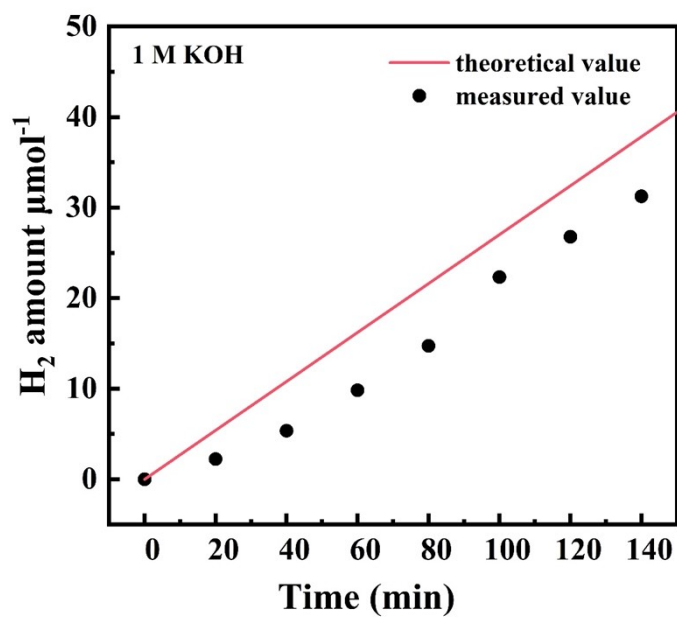

**Fig. S6.** Faradaic efficiency of Ni<sub>3</sub>S<sub>2</sub>@Ni<sub>3</sub>B/NP for HER.

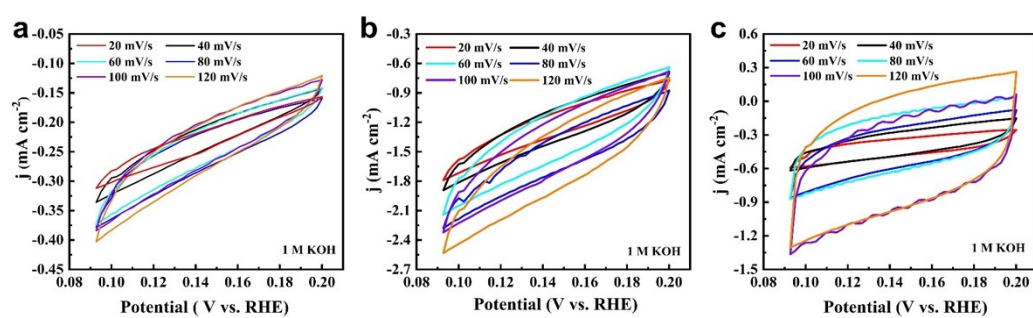

**Fig. S7.** Cyclic Voltammetry curves of (a) Ni<sub>3</sub>B, (b) Ni<sub>3</sub>S<sub>2</sub> and (c) Ni<sub>3</sub>S<sub>2</sub>@Ni<sub>3</sub>B/NP.

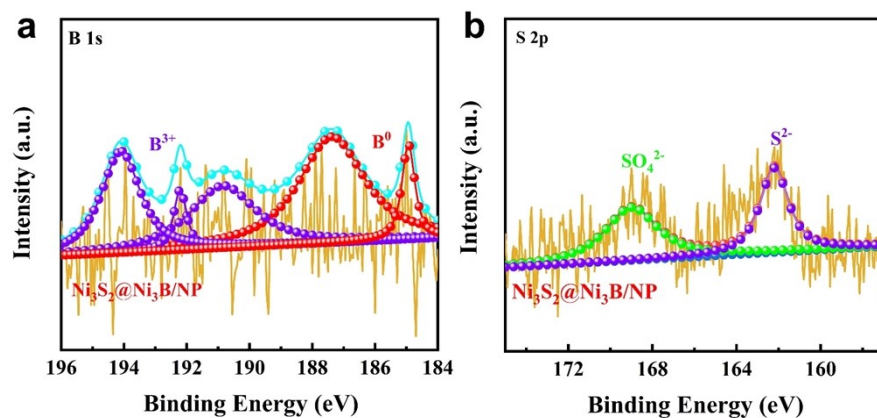

**Fig. S8.** High-resolution XPS spectra of (a) B 1s and (b) S 2p in Ni<sub>3</sub>S<sub>2</sub>@Ni<sub>3</sub>B/NP.

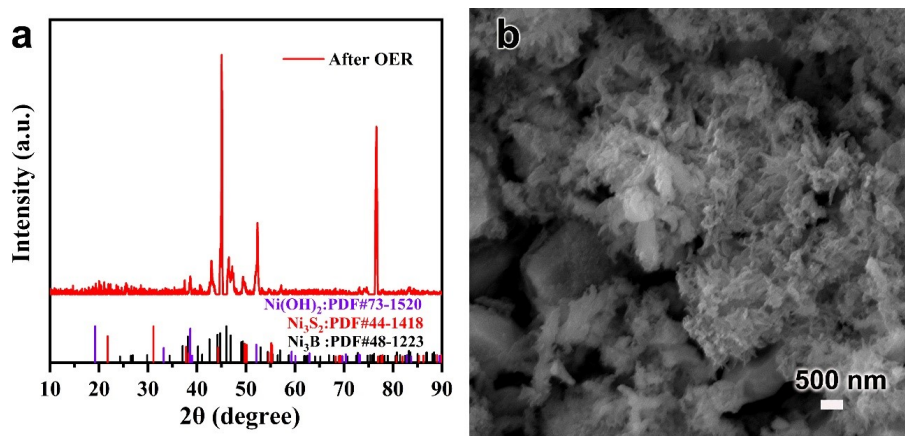

**Fig. S9.** (a) XRD pattern and (b) SEM images of Ni<sub>3</sub>S<sub>2</sub>@Ni<sub>3</sub>B/NP after OER.

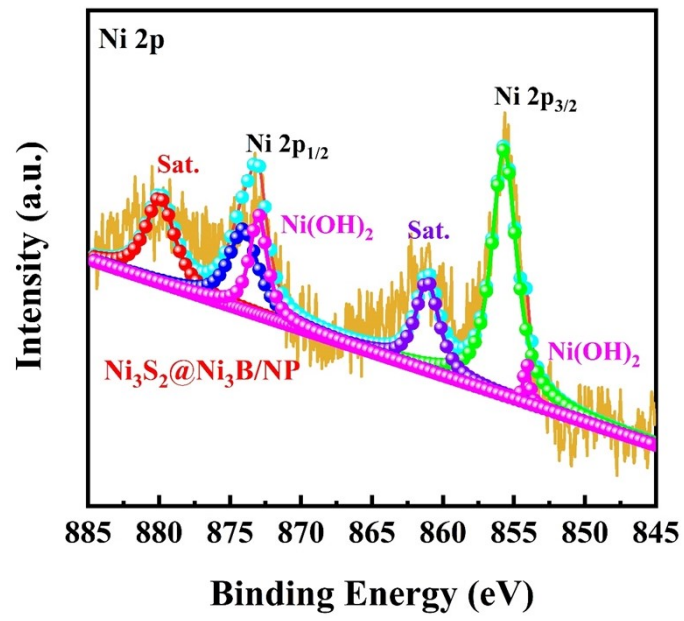

**Fig. S10.** High-resolution XPS spectra of  $\text{Ni}_3\text{S}_2@\text{Ni}_3\text{B}/\text{NP}$  after OER.

**Table S3.** Comparison of the electrocatalytic performance of Ni<sub>3</sub>S<sub>2</sub>@Ni<sub>3</sub>B/NP with some representative electrocatalysts reported recently for HER and OER.

| Catalyst                                             | Electrolyte solution | HER/OER | Current density (j)                                                           | Overpotential ( $\eta$ )   | Stability test | Reference                                  |
|------------------------------------------------------|----------------------|---------|-------------------------------------------------------------------------------|----------------------------|----------------|--------------------------------------------|
| Ni <sub>3</sub> S <sub>2</sub> @Ni <sub>3</sub> B/NP | 1 M KOH              | HER     | 10 mA cm <sup>-2</sup><br>100 mA cm <sup>-2</sup><br>1000 mA cm <sup>-2</sup> | 182 mV<br>304 mV<br>517 mV | 100 h          | This work                                  |
|                                                      |                      | OER     | 10 mA cm <sup>-2</sup><br>100 mA cm <sup>-2</sup><br>1000 mA cm <sup>-2</sup> | 288 mV<br>383 mV<br>632 mV |                |                                            |
| Ni <sub>3</sub> B/NP                                 | 1 M KOH              | OER     | 10 mA cm <sup>-2</sup>                                                        | 300 mV                     | 1500 h         | J. Mater. Chem. A, 2019, 7, 5288.          |
| Ni-Fe-OH@Ni <sub>3</sub> S <sub>2</sub> /NF          | 1 M KOH              | OER     | 100 mA cm <sup>-2</sup>                                                       | 300 mV                     | 50 h           | Adv. Mater., 2017, 29, 1606200.            |
| Ni <sub>3</sub> S <sub>2</sub> /NF                   | 1 M KOH              | HER     | 10 mA cm <sup>-2</sup>                                                        | 223 mV                     | 200 h          | J. Am. Chem. Soc. 2015, 137, 14023.        |
|                                                      |                      | OER     |                                                                               | 260 mV                     |                |                                            |
| boronized NiFe                                       | 1 M KOH              | OER     | 10 mA cm <sup>-2</sup>                                                        | 309 mV                     | 3000 h         | Energy Environ. Sci., 2019, 12, 684.       |
| Zr <sub>0.8</sub> Ni <sub>0.2</sub> B <sub>2</sub>   | 1 M KOH              | OER     | 10 mA cm <sup>-2</sup>                                                        | 350 mV                     | 12 h           | Electrochim. Acta, 2021, 389, 138789.      |
| Zr <sub>0.8</sub> Co <sub>0.2</sub> B <sub>2</sub>   |                      | HER     |                                                                               | 420 mV                     | 12 h           |                                            |
| Co-B@Co-Bi                                           | 1 M KOH              | OER     | 10 mA cm <sup>-2</sup>                                                        | 291 mV                     | 25 h           | ACS Sustainable Chem. Eng., 2019, 7, 5620. |
| Ni <sub>1</sub> Co <sub>3</sub> @BC                  | 1 M KOH              | OER     | 10 mA cm <sup>-2</sup>                                                        | 309 mV                     | 20 h           | Appl. Surf. Sci., 2020, 532, 147381.       |
| Cu(OH) <sub>2</sub> NRs@Ni(OH) <sub>2</sub> NSs      | 1 M KOH              | HER     | 10 mA cm <sup>-2</sup>                                                        | 200 mV                     | 20 h           | ChemistrySelect, 2021, 6, 4129.            |
| Ni <sub>3</sub> S <sub>2</sub> /NF                   | 1 M KOH              | HER     | 10 mA cm <sup>-2</sup>                                                        | 189 mV                     | 50 h           | J. Mater. Chem. A, 2019 7, 18003.          |
|                                                      |                      | OER     | 10 mA cm <sup>-2</sup>                                                        | 296 mV                     | 5000 s         |                                            |
| Ni <sub>3</sub> S <sub>2</sub> @Co(OH) <sub>2</sub>  | 1 M KOH              | OER     | 10 mA cm <sup>-2</sup>                                                        | 290 mV                     | 40 h           | Int. J. Hydrogen Energ., 2019, 44, 22955.  |
